# Supplementary material
Source: Springer Nature journal article supplement (https://www.springermedizin.de/resource/supplementary/12936_2013_2915_MOESM1_ESM.pdf/9544584)

# Annual Peruvian Malaria Cases

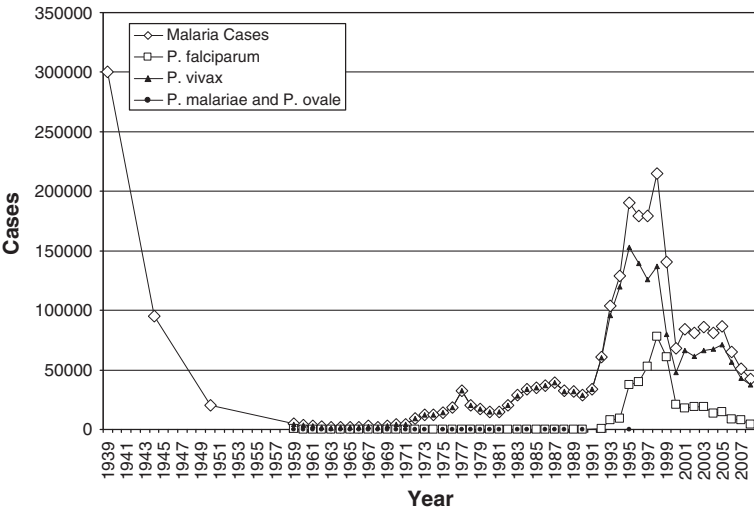

Supplement: MOESM1 [file 9544584]
